# Supplementary material for: Hepatitis C Virus Proteins Interact with the Endosomal Sorting Complex Required for Transport (ESCRT) Machinery via Ubiquitination To Facilitate Viral Envelopment
Source: PubMed Central journal article supplement (PMC5090039; doi:10.1128/mbio.01456-16), 2016-11-01

Fig. S3

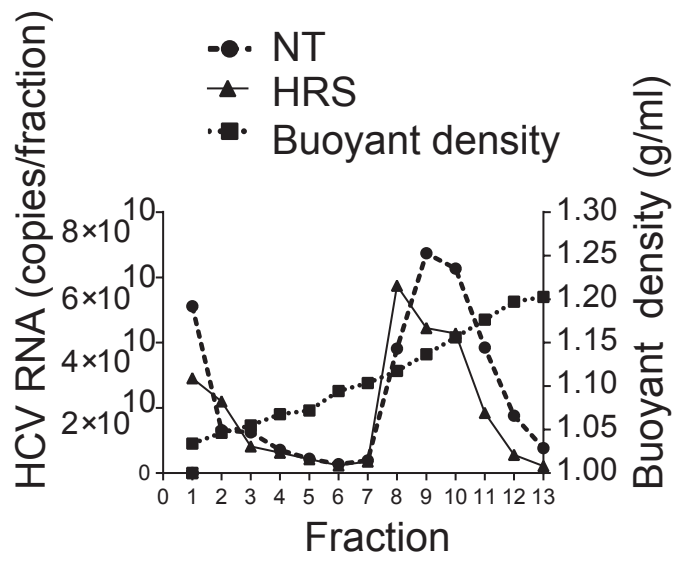

Supplement: mbo005163053sf3.pdf [file mbo005163053sf3.pdf]
