# Supplementary material for: Hepatitis C Virus Proteins Interact with the Endosomal Sorting Complex Required for Transport (ESCRT) Machinery via Ubiquitination To Facilitate Viral Envelopment
Source: PubMed Central journal article supplement (PMC5090039; doi:10.1128/mbio.01456-16), 2016-11-01
Supplement: mbo005163053st1.pdf [file mbo005163053st1.pdf]

**Table S1. ESCRT-HCV interactions by PCAs.**

| Gene Symbol    | Accession number | Average Z-score |          |           |          |          |          |           |          |
|----------------|------------------|-----------------|----------|-----------|----------|----------|----------|-----------|----------|
|                |                  | Core            | P7       | NS2       | NS3      | NS4A     | NS4B     | NS5A      | NS5B     |
| STAM2          | BC028740         | 0.015676        | -0.87888 | 1.242908  | -0.21701 | -0.5705  | -0.22255 | 0.823636  | 0.257903 |
| HR5 (HGS)      | BC003565         | 1.745720        | 2.26808  | 3.157132  | 0.028608 | 2.598538 | 2.088448 | 3.177182  | 1.434086 |
| TSG101         | BC002487         | 0.978705        | -0.52204 | 0.356236  | 0.035954 | 0.322811 | -0.36715 | 1.045919  | 0.566733 |
| VPS28 (1)      | BC006485         | 0.930497        | -0.93367 | 0.448833  | -0.15416 | 0.172568 | -0.07173 | 1.071721  | 0.542738 |
| VPS28 (2)      | BC050713         | 1.141563        | -0.72542 | 1.112355  |          |          | 1.126087 | 0.806110  | 0.623822 |
| VPS37A (1)     | BC022363         | -0.24548        | -1.23696 | -0.141760 | 0.039051 | -0.3859  | 0.564386 | -0.167430 | -0.02964 |
| VPS37A (2)     | BC067754         | -0.34658        | -0.72658 | 0.559987  |          |          |          | 0.023898  |          |
| VPS37B         | BC005882         | -0.48771        | -0.91372 | -0.894400 | 0.036569 | -0.06401 | -0.07868 | 0.172169  | 0.032803 |
| EAP20          | BC006282         | 1.13980         | -0.70028 | 1.545432  | -0.14616 | 0.647735 | 1.143455 | 1.267538  | 0.994738 |
| EAP30 (1)      | BC008976         | 1.005334        | -0.86184 | 0.567178  | -0.03613 | -0.02766 | -0.75545 | 0.666017  | 0.741755 |
| EAP30 (2)      | BC038830         | 1.118476        | -0.84453 | 0.719862  |          |          |          | 0.646895  |          |
| CHMP1A         | BC132711         | 2.664497        | -0.02382 | 0.205736  | -0.08462 | 0.878546 | 0.415478 | 1.152735  | 1.698734 |
| CHMP1B         | BC012733         | 0.274438        | -1.09985 | 0.324901  | -0.53597 | -0.5369  | 0.019723 | -0.181960 | -0.3047  |
| CHMP2A         | BC002502         | 0.788947        | -0.68396 | -0.133890 | -0.20861 | 0.455527 | 0.274951 | 0.843631  | 1.291945 |
| CHMP2B         | BC001553         | 0.255074        | -0.70501 | -0.737320 | -0.49813 | -0.25226 | -0.61044 | -0.301020 | 0.820115 |
| CHMP3          | BC004419         | 1.306319        | -0.4086  | 0.139431  | -0.19385 | 0.401511 | 0.440229 | 0.498064  | 1.103606 |
| CHMP4A         | BC010893         | 0.810694        | -1.17724 | -0.915160 | -0.19525 | -0.72572 | -0.94102 | 0.167168  | -0.04455 |
| CHMP4B         | BC033859         | 2.256789        | -0.05645 | 0.437642  | -0.14535 | 1.301781 | 0.551387 | 1.812682  | 1.246107 |
| CHMP4C         | BC014321         | 1.254212        | -0.55187 | 0.119456  | -0.48356 | 0.70787  | 0.395773 | 1.168513  | 0.920982 |
| CHMP5 (1)      | BC006974         | 1.757326        | -0.71619 | -0.295950 | -0.06029 | 0.666511 | -0.06803 | 1.050358  | 1.146025 |
| CHMP5 (2)      | BC007457         | 1.975911        | -0.66587 | -0.327370 |          |          |          | 0.980075  |          |
| CHMP5 (3)      | BC016698         | 1.829131        | -0.76255 | -0.338680 |          |          |          | 0.995204  |          |
| CHMP6          | BC010108         | 1.520425        | -0.61842 | 0.112238  | -0.40555 | -0.73584 | 0.118734 | 1.781411  | -0.41848 |
| VPS4A          | BC047932         | 1.628982        | 0.54400  | 0.628990  | 0.092851 | 0.583414 | -0.23707 | 2.360545  | 1.366084 |
| VPS4B          | BC039574         | 1.193767        | -0.11577 | 0.144372  | -0.01901 | -0.05435 | -0.54783 | 0.922353  | 0.763869 |
| VTA1           | BC141827         | 0.603682        | -0.97785 | 0.030349  | 0.107913 | -0.32267 | -1.1398  | 1.731984  | 0.942911 |
| RPF1           | BC016051         | 1.046517        | -1.31691 | -0.847280 | -1.01345 | -0.22958 | -0.7572  | -0.211310 | 0.173545 |
| SLC9A6         | BC049169         | 2.807277        | 1.000692 | 3.394888  | -0.16306 | 1.447177 | 1.245898 | 0.937158  | 1.031942 |
| ALIX (PDCD6IP) | BC020066         | 1.067352        | -0.63400 | 0.684455  | -0.02528 | -0.09421 | 0.383872 | 1.835367  | 1.127457 |

The first and second columns list gene symbols and accession numbers. Numbers in parenthesis represent several copies of the same ORF in the human ORFeome library. The second to eighth columns list the average z-scores measured by PCAs in three independent experiments each in triplicates.
