# Supplementary material for: Hepatitis C Virus Proteins Interact with the Endosomal Sorting Complex Required for Transport (ESCRT) Machinery via Ubiquitination To Facilitate Viral Envelopment
Source: PubMed Central journal article supplement (PMC5090039; doi:10.1128/mbio.01456-16), 2016-11-01
Supplement: mbo005163053st2.pdf [file mbo005163053st2.pdf]

**Table S2. Protein interactions of a Random Reference Set (RRS) tested by PCAs to benchmark the screen.**

| Gene Symbol (Interactor A) | Accession number (Interactor A) | Gene Symbol (Interactor B) | Accession number (Interactor B) | Average Z- Score |
|----------------------------|---------------------------------|----------------------------|---------------------------------|------------------|
| Clic4                      | BC012444                        | P21                        | BC000275                        | -0.28116         |
| Clic4                      | BC012444                        | CD63                       | BC002349                        | 0.48988          |
| Clic4                      | BC012444                        | Sco1                       | BC015504                        | 0.00597          |
| Clic4                      | BC012444                        | TGIF                       | BC031268                        | -0.64097         |
| Clic4                      | BC012444                        | ZFYV9                      | BC032680                        | 0.26785          |
| Clic4                      | BC012444                        | Cul2                       | BC009591                        | -0.29798         |
| Clic4                      | BC012444                        | TCTP                       | BC003352                        | -0.22649         |
| PLSL                       | BC007673                        | P21                        | BC000275                        | -1.82693         |
| PLSL                       | BC007673                        | CD63                       | BC002349                        | -1.41779         |
| PLSL                       | BC007673                        | Sco1                       | BC015504                        | -1.52319         |
| PLSL                       | BC007673                        | TGIF                       | BC031268                        | -1.93038         |
| PLSL                       | BC007673                        | ZFYV9                      | BC032680                        | -1.00535         |
| PLSL                       | BC007673                        | Cul2                       | BC009591                        | -1.39101         |
| PLSL                       | BC007673                        | TCTP                       | BC003352                        | -1.83576         |
| GPR87                      | BC009540                        | P21                        | BC000275                        | -0.89406         |
| GPR87                      | BC009540                        | CD63                       | BC002349                        | 1.82948          |
| GPR87                      | BC009540                        | Sco1                       | BC015504                        | -0.79888         |
| GPR87                      | BC009540                        | TGIF                       | BC031268                        | -0.97016         |
| GPR87                      | BC009540                        | ZFYV9                      | BC032680                        | -0.72268         |
| GPR87                      | BC009540                        | Cul2                       | BC009591                        | -0.87390         |
| GPR87                      | BC009540                        | TCTP                       | BC003352                        | -0.79490         |
| SNP1                       | BC027040                        | P21                        | BC000275                        | 0.79422          |
| SNP1                       | BC027040                        | CD63                       | BC002349                        | 0.86158          |
| SNP1                       | BC027040                        | Sco1                       | BC015504                        | 0.78750          |
| SNP1                       | BC027040                        | TGIF                       | BC031268                        | 1.56015          |
| SNP1                       | BC027040                        | ZFYV9                      | BC032680                        | -0.32781         |
| SNP1                       | BC027040                        | Cul2                       | BC009591                        | 0.73479          |
| SNP1                       | BC027040                        | TCTP                       | BC003352                        | -0.46141         |
| SYND4                      | BC030805                        | P21                        | BC000275                        | -0.62872         |
| SYND4                      | BC030805                        | Sco1                       | BC015504                        | 0.41904          |
| SYND4                      | BC030805                        | TGIF                       | BC031268                        | -0.93836         |
| SYND4                      | BC030805                        | ZFYV9                      | BC032680                        | -0.50770         |
| SYND4                      | BC030805                        | Cul2                       | BC009591                        | -0.26543         |
| SYND4                      | BC030805                        | TCTP                       | BC003352                        | -0.23992         |
| DDIT3                      | BC003637                        | P21                        | BC000275                        | 0.16148          |
| DDIT3                      | BC003637                        | CD63                       | BC002349                        | 1.87110          |
| DDIT3                      | BC003637                        | Sco1                       | BC015504                        | 1.45736          |
| DDIT3                      | BC003637                        | TGIF                       | BC031268                        | 0.71079          |
| DDIT3                      | BC003637                        | ZFYV9                      | BC032680                        | 0.51147          |
| DDIT3                      | BC003637                        | Cul2                       | BC009591                        | 0.96960          |
| DDIT3                      | BC003637                        | TCTP                       | BC003352                        | 0.40707          |

| Gene Symbol<br>(Interactor A) | Accession number<br>(Interactor A) | Gene Symbol<br>(Interactor B) | Accession number<br>(Interactor B) | Average Z- Score |
|-------------------------------|------------------------------------|-------------------------------|------------------------------------|------------------|
| SNX15                         | BC009896                           | P21                           | BC000275                           | 1.20272          |
| SNX15                         | BC009896                           | CD63                          | BC002349                           | 1.44127          |
| SNX15                         | BC009896                           | Sco1                          | BC015504                           | 1.46132          |
| SNX15                         | BC009896                           | TGIF                          | BC031268                           | 1.15180          |
| SNX15                         | BC009896                           | Cul2                          | BC009591                           | 1.40228          |
| SNX15                         | BC009896                           | TCTP                          | BC003352                           | 1.00368          |
| CKLF1                         | BC009942                           | P21                           | BC000275                           | -0.31429         |
| CKLF1                         | BC009942                           | Sco1                          | BC015504                           | 0.12415          |
| CKLF1                         | BC009942                           | TGIF                          | BC031268                           | -0.46713         |
| CKLF1                         | BC009942                           | ZFYV9                         | BC032680                           | -0.12612         |
| CKLF1                         | BC009942                           | Cul2                          | BC009591                           | -0.01303         |
| CKLF1                         | BC009942                           | TCTP                          | BC003352                           | 0.09578          |

The first four columns list gene symbols and accession numbers of the interactors (A and B). The fifth column lists the average z-scores measured by PCAs in three independent experiments each in triplicates.
