# Supplementary material for: Hepatitis C Virus Proteins Interact with the Endosomal Sorting Complex Required for Transport (ESCRT) Machinery via Ubiquitination To Facilitate Viral Envelopment
Source: PubMed Central journal article supplement (PMC5090039; doi:10.1128/mbio.01456-16), 2016-11-01
Supplement: mbo005163053st3.pdf [file mbo005163053st3.pdf]

**Table S3. Known positive protein interactions tested by PCAs.**

| Gene Symbol (Interactor A) | Accession number (Interactor A) | Gene Symbol (Interactor B) | Accession number (Interactor B) | Average Z-Score | Reference                |
|----------------------------|---------------------------------|----------------------------|---------------------------------|-----------------|--------------------------|
| Core                       | --                              | AP2M1                      | BC013796                        | 2.17            | (7)                      |
| P7                         | --                              | MS4A6A                     | BC022854                        | 2.31            | (10)                     |
| NS2                        | --                              | CIDEB                      | BC035970                        | 1.45            | (11)                     |
| NS3/NS4A                   | --                              | GFAP                       | BC013596                        | 1.86            | (12)                     |
| NS3/NS4A                   | --                              | TBK1                       | BC034950                        | 2.54            | (13)                     |
| NS4A                       | --                              | CREB3                      | BC010158                        | 1.44            | (12)                     |
| NS4B                       | --                              | STING                      | BC047779                        | 2.2             | (14)                     |
| NS4B                       | --                              | ATF6B                      | BC008394                        | 1.44            | (15)                     |
| NS5A                       | --                              | VAPA                       | BC002992                        | 3.24            | Reviewed in (16)         |
| NS5A                       | --                              | RAF1                       | BC018119                        | 2.35            | Reviewed in (He Y, 2006) |
| NS5A                       | --                              | GRB2                       | BC000631                        | 3.06            | Reviewed in (He Y, 2006) |
| NS5A                       | --                              | PITX                       | BC003685                        | 2.04            | Reviewed in (He Y, 2006) |
| NS5A                       | --                              | P53                        | BC003596                        | 2.005           | Reviewed in (He Y, 2006) |
| NS5B                       | --                              | hVAP33                     | BC002992                        | 3.19            | (17)                     |
| NS5B                       | --                              | NCL                        | BC002343                        | 1.68            | (18)                     |
| HRS                        | BC003565                        | TSG101                     | BC002487                        | 2.30            | (19)                     |
| SMAD4                      | BC002379                        | SKIL                       | BC059386                        | 6.34            | (2)                      |

The first four columns list gene symbols and accession numbers of the interactors (A and B). The fifth column lists the average z-scores measured by PCAs in three independent experiments each in triplicates.
